# Supplementary material for: Identification of amygdala-expressed genes associated with autism spectrum disorder
Source: Mol Autism. 2020 May 27;11:39. doi: 10.1186/s13229-020-00346-1 (PMC7251751; doi:10.1186/s13229-020-00346-1)
Supplement: Supplementary file 4 — Additional file 4. DEG human autism amygdala. [file 13229_2020_346_MOESM4_ESM.xls]

## Sheet: C_1
	gene.IDs	gene.names	gene.biotypes	FCs	FDRs	raw_FC
1	ENSG00000152208	GRID2	protein_coding	0.990808	0.000629209	0.882848
2	ENSG00000156475	PPP2R2B	protein_coding	-0.621284	0.00984499	-0.404744
3	ENSG00000118515	SGK1	protein_coding	0.68305	0.0483109	0.660925

## Sheet: C_10
	gene.IDs	gene.names	gene.biotypes	FCs	FDRs	raw_FC
1	ENSG00000133104	SPG20	protein_coding	0.302083	0.000182027	0.228597
2	ENSG00000099715	PCDH11Y	protein_coding	-0.609629	0.000296484	-0.413999
5	ENSG00000096060	FKBP5	protein_coding	0.229295	0.000931659	0.180966
6	ENSG00000144036	EXOC6B	protein_coding	0.237374	0.000931659	0.231548
7	ENSG00000162687	KCNT2	protein_coding	0.385008	0.000931659	0.343049
8	ENSG00000215252	GOLGA8B	protein_coding	-0.189057	0.000931659	-0.232508
9	ENSG00000099622	CIRBP	protein_coding	-0.333405	0.00117985	-0.32257
10	ENSG00000102317	RBM3	protein_coding	-0.227001	0.00117985	-0.15681
12	ENSG00000188596	CFAP54	protein_coding	0.275184	0.00117985	0.204015
13	ENSG00000164989	CCDC171	protein_coding	0.243004	0.00137506	0.259579
16	ENSG00000109911	ELP4	protein_coding	0.238503	0.00231576	0.157592
18	ENSG00000133640	LRRIQ1	protein_coding	0.20712	0.00231576	0.157214
21	ENSG00000189403	HMGB1	protein_coding	0.341037	0.00231576	0.272993
24	ENSG00000149311	ATM	protein_coding	0.219209	0.00235838	0.151088
25	ENSG00000117410	ATP6V0B	protein_coding	-0.247748	0.00237738	-0.289151
30	ENSG00000170017	ALCAM	protein_coding	-0.578085	0.00293499	-0.483025
31	ENSG00000183023	SLC8A1	protein_coding	0.283676	0.00293499	0.384138
32	ENSG00000184588	PDE4B	protein_coding	-0.336992	0.00293499	-0.385257
35	ENSG00000185880	TRIM69	protein_coding	0.1881	0.00297951	0.165781
36	ENSG00000111711	GOLT1B	protein_coding	-0.230543	0.00300668	-0.186795
37	ENSG00000135365	PHF21A	protein_coding	0.168165	0.00342939	0.141166
38	ENSG00000152932	RAB3C	protein_coding	0.197179	0.00342939	0.291804
39	ENSG00000242593	RP5-921G16.1	antisense	0.290298	0.00342939	0.187534
40	ENSG00000152270	PDE3B	protein_coding	0.260771	0.00346662	0.181864
43	ENSG00000187094	CCK	protein_coding	-0.448522	0.00384186	-0.345408
44	ENSG00000187730	GABRD	protein_coding	-0.150385	0.00384186	-0.144514
46	ENSG00000151338	MIPOL1	protein_coding	0.296189	0.0040033	0.250462
48	ENSG00000245685	AF146191.4	lincRNA	0.222335	0.00439773	0.19019
54	ENSG00000173926	MARCH3	protein_coding	0.212785	0.00497251	0.177312
55	ENSG00000063180	CA11	protein_coding	-0.196339	0.0053298	-0.170995
56	ENSG00000198130	HIBCH	protein_coding	0.238643	0.0053298	0.145605
57	ENSG00000164070	HSPA4L	protein_coding	0.231581	0.00546895	0.194859
58	ENSG00000137727	ARHGAP20	protein_coding	-0.169496	0.00548821	-0.14521
60	ENSG00000170242	USP47	protein_coding	0.180107	0.00584875	0.150274
61	ENSG00000105696	TMEM59L	protein_coding	-0.264647	0.00668211	-0.16737
67	ENSG00000165495	PKNOX2	protein_coding	-0.196327	0.00771755	-0.198458
74	ENSG00000171843	MLLT3	protein_coding	0.358918	0.00865698	0.277213
77	ENSG00000145012	LPP	protein_coding	0.407902	0.00902258	0.292715
79	ENSG00000152795	HNRNPDL	protein_coding	-0.215338	0.00924165	-0.241055
82	ENSG00000231079	AC105402.4	antisense	-0.689878	0.0100006	-0.552796
84	ENSG00000170776	AKAP13	protein_coding	0.183292	0.0102807	0.164806
85	ENSG00000075292	ZNF638	protein_coding	0.253974	0.0104748	0.168459
88	ENSG00000082898	XPO1	protein_coding	0.277011	0.0105946	0.208413
94	ENSG00000250608	RP11-933H2.4	processed_transcript	0.206441	0.0111829	0.140071
97	ENSG00000138439	FAM117B	protein_coding	0.176953	0.0119205	0.15655
101	ENSG00000186952	TMEM232	protein_coding	0.327447	0.0119761	0.23963
103	ENSG00000151422	FER	protein_coding	0.190088	0.012905	0.238064
108	ENSG00000063660	GPC1	protein_coding	-0.154826	0.0131906	-0.144765
109	ENSG00000114416	FXR1	protein_coding	0.173803	0.0132349	0.170412
114	ENSG00000234323	RP11-308N19.1	lincRNA	0.155598	0.0141729	0.148708
117	ENSG00000196937	FAM3C	protein_coding	-0.145713	0.0143451	-0.176323
118	ENSG00000064042	LIMCH1	protein_coding	0.310022	0.0150661	0.244775
121	ENSG00000170959	DCDC1	protein_coding	0.215766	0.0150989	0.146472
127	ENSG00000182185	RAD51B	protein_coding	0.230149	0.0154555	0.197528
130	ENSG00000189283	FHIT	protein_coding	0.217273	0.0157207	0.275831
134	ENSG00000188641	DPYD	protein_coding	0.384848	0.0162689	0.24802
143	ENSG00000243701	DUBR	lincRNA	0.257454	0.0177744	0.229323
145	ENSG00000171724	VAT1L	protein_coding	0.18085	0.0182796	0.18527
150	ENSG00000180628	PCGF5	protein_coding	0.185552	0.0193116	0.150209
151	ENSG00000198589	LRBA	protein_coding	0.204358	0.0194906	0.166007
153	ENSG00000081026	MAGI3	protein_coding	0.303913	0.020193	0.425642
156	ENSG00000151229	SLC2A13	protein_coding	1.47248	0.0202885	0.315382
157	ENSG00000167037	SGSM1	protein_coding	0.212468	0.0204855	0.262681
167	ENSG00000121879	PIK3CA	protein_coding	0.216587	0.0224915	0.182613
169	ENSG00000144445	KANSL1L	protein_coding	0.223745	0.0229535	0.151214
172	ENSG00000155974	GRIP1	protein_coding	0.248619	0.0230659	0.45551
173	ENSG00000175265	GOLGA8A	protein_coding	-0.159767	0.0230659	-0.144034
178	ENSG00000151320	AKAP6	protein_coding	0.182083	0.0232782	0.162244
182	ENSG00000177600	RPLP2	protein_coding	-0.166278	0.0236879	-0.394975
185	ENSG00000102908	NFAT5	protein_coding	0.16664	0.0248941	0.167972
188	ENSG00000163116	STPG2	protein_coding	0.152554	0.0250217	0.142031
190	ENSG00000186481	ANKRD20A5P	transcribed_unprocessed_pseudogene	0.216067	0.0257307	0.193357
192	ENSG00000224905	AP001347.6	antisense	0.405356	0.0257307	0.272442
198	ENSG00000237268	RP13-492C18.2	transcribed_unprocessed_pseudogene	0.372636	0.0263505	0.267278
200	ENSG00000107864	CPEB3	protein_coding	0.169524	0.0266206	0.145079
207	ENSG00000248079	DPH6-AS1	lincRNA	0.376317	0.0268711	0.334853
214	ENSG00000213160	KLHL23	protein_coding	-0.161013	0.0280884	-0.148055
216	ENSG00000049323	LTBP1	protein_coding	0.168705	0.028297	0.155367
219	ENSG00000070808	CAMK2A	protein_coding	-0.309701	0.0289911	-0.235809
224	ENSG00000136267	DGKB	protein_coding	0.496375	0.0289911	0.180566
226	ENSG00000198597	ZNF536	protein_coding	-0.382684	0.0289911	-0.285006
229	ENSG00000131374	TBC1D5	protein_coding	0.22327	0.0301738	0.162109
232	ENSG00000144283	PKP4	protein_coding	0.186569	0.0304519	0.262144
234	ENSG00000122507	BBS9	protein_coding	0.182079	0.0305835	0.165288
242	ENSG00000237491	RP11-206L10.9	lincRNA	0.244529	0.032406	0.182267
243	ENSG00000055332	EIF2AK2	protein_coding	0.204682	0.0324583	0.14607
244	ENSG00000058335	RASGRF1	protein_coding	-0.265261	0.0324926	-0.166751
247	ENSG00000149970	CNKSR2	protein_coding	0.354288	0.0327786	0.288731
260	ENSG00000272568	CTB-113D17.1	antisense	0.32172	0.03354	0.257314
272	ENSG00000174482	LINGO2	protein_coding	-0.177983	0.035177	-0.225036
274	ENSG00000205035	RP11-707M1.1	transcribed_unprocessed_pseudogene	0.246025	0.035177	0.273896
287	ENSG00000225206	MIR137HG	lincRNA	0.227667	0.0358645	0.377212
294	ENSG00000165533	TTC8	protein_coding	-0.150251	0.0368482	-0.151992
301	ENSG00000204764	RANBP17	protein_coding	0.166608	0.0379853	0.182471
303	ENSG00000138311	ZNF365	protein_coding	0.276053	0.0384238	0.200488
310	ENSG00000184349	EFNA5	protein_coding	0.21369	0.0396714	0.334426
320	ENSG00000152208	GRID2	protein_coding	0.415342	0.0433787	0.649197
324	ENSG00000109756	RAPGEF2	protein_coding	0.338867	0.043776	0.226793
329	ENSG00000184156	KCNQ3	protein_coding	-0.386011	0.0439951	-0.360756
334	ENSG00000120694	HSPH1	protein_coding	0.359924	0.0441554	0.311946
341	ENSG00000009694	TENM1	protein_coding	0.195908	0.0450221	0.176427
348	ENSG00000169032	MAP2K1	protein_coding	-0.188909	0.0450221	-0.18048
351	ENSG00000143195	ILDR2	protein_coding	-0.207862	0.0450734	-0.174693
357	ENSG00000112232	KHDRBS2	protein_coding	0.204685	0.0454102	0.425336
364	ENSG00000115252	PDE1A	protein_coding	0.198324	0.0454397	0.425892
365	ENSG00000135976	ANKRD36	protein_coding	0.212102	0.0454397	0.213869
377	ENSG00000182901	RGS7	protein_coding	-0.398601	0.0469385	-0.373661
379	ENSG00000152601	MBNL1	protein_coding	0.313646	0.0471242	0.279347
383	ENSG00000145349	CAMK2D	protein_coding	0.301436	0.047373	0.521592
388	ENSG00000070756	PABPC1	protein_coding	0.45082	0.0476512	0.355668
389	ENSG00000182240	BACE2	protein_coding	0.19456	0.0476512	0.152776
391	ENSG00000114439	BBX	protein_coding	0.188944	0.0479024	0.191688
392	ENSG00000139173	TMEM117	protein_coding	0.225635	0.0479916	0.15271
395	ENSG00000064607	SUGP2	protein_coding	-0.173885	0.0482482	-0.209073
401	ENSG00000165966	PDZRN4	protein_coding	0.563452	0.0488189	0.437042
404	ENSG00000132938	MTUS2	protein_coding	0.14765	0.0491307	0.265067
410	ENSG00000080608	PUM3	protein_coding	-0.266096	0.0494238	-0.194843

## Sheet: C_11
	gene.IDs	gene.names	gene.biotypes	FCs	FDRs	raw_FC
1	ENSG00000227082	CH17-437K3.1	lincRNA	1.28288	0.00191691	0.889744

## Sheet: C_12
	gene.IDs	gene.names	gene.biotypes	FCs	FDRs	raw_FC
1	ENSG00000165752	STK32C	protein_coding	0.24146	0.0110115	0.166042
2	ENSG00000183036	PCP4	protein_coding	-1.40001	0.0110115	-0.229045
4	ENSG00000167552	TUBA1A	protein_coding	-0.78543	0.0188265	-0.242021
5	ENSG00000237350	CDC42P6	processed_pseudogene	0.181619	0.0188265	0.188574
7	ENSG00000067064	IDI1	protein_coding	-0.716826	0.0437782	-0.226972
9	ENSG00000172020	GAP43	protein_coding	-0.975667	0.0437782	-0.202245
11	ENSG00000185551	NR2F2	protein_coding	0.295408	0.0437782	0.217068
12	ENSG00000137563	GGH	protein_coding	-0.768335	0.0463723	-0.184819
13	ENSG00000170500	LONRF2	protein_coding	0.747427	0.0463723	0.655853
14	ENSG00000171617	ENC1	protein_coding	1.54299	0.0463723	0.348194
15	ENSG00000186642	PDE2A	protein_coding	0.225177	0.0463723	0.237455
16	ENSG00000146701	MDH2	protein_coding	-0.550003	0.0468351	-0.226541

## Sheet: C_13
	gene.IDs	gene.names	gene.biotypes	FCs	FDRs	raw_FC
1	ENSG00000131095	GFAP	protein_coding	-1.53921	0.000549173	-0.596787
2	ENSG00000123560	PLP1	protein_coding	-1.4028	0.00143017	-0.261514
3	ENSG00000112576	CCND3	protein_coding	0.327781	0.00418955	0.574798
4	ENSG00000136297	MMD2	protein_coding	-0.779891	0.00448853	-0.692548
5	ENSG00000166833	NAV2	protein_coding	-0.790661	0.00722806	-0.49408
6	ENSG00000170390	DCLK2	protein_coding	-0.872086	0.00722806	-0.640637
7	ENSG00000146122	DAAM2	protein_coding	-0.788216	0.00907383	-0.519971
8	ENSG00000130226	DPP6	protein_coding	-0.898116	0.0189388	-0.833486
9	ENSG00000114315	HES1	protein_coding	-0.838114	0.0254449	-0.318442
10	ENSG00000197959	DNM3	protein_coding	0.75598	0.0254449	0.544831
12	ENSG00000116147	TNR	protein_coding	-0.397704	0.0300405	-0.33805

## Sheet: C_2
	gene.IDs	gene.names	gene.biotypes	FCs	FDRs	raw_FC
1	ENSG00000091138	SLC26A3	protein_coding	5.869	0.000119766	1.84749
3	ENSG00000138670	RASGEF1B	protein_coding	1.70758	0.00113466	1.29954
4	ENSG00000168702	LRP1B	protein_coding	1.94363	0.00113466	1.23292
8	ENSG00000078369	GNB1	protein_coding	-0.506828	0.0243713	-0.394215
9	ENSG00000117114	ADGRL2	protein_coding	0.409004	0.0243713	0.380891
11	ENSG00000179889	PDXDC1	protein_coding	-1.17112	0.0243713	-0.417813
12	ENSG00000187094	CCK	protein_coding	-2.39651	0.0243713	-0.521808
13	ENSG00000205542	TMSB4X	protein_coding	-1.17723	0.0243713	-0.484849
14	ENSG00000236824	BCYRN1	lincRNA	0.310564	0.0243713	0.680695
15	ENSG00000184305	CCSER1	protein_coding	4.1514	0.0283553	0.48255
16	ENSG00000232573	RPL3P4	processed_pseudogene	-0.874775	0.0283553	-0.367173
17	ENSG00000100554	ATP6V1D	protein_coding	-2.32102	0.032705	-0.26665
18	ENSG00000128989	ARPP19	protein_coding	-1.52898	0.032705	-0.517071
20	ENSG00000111011	RSRC2	protein_coding	-2.12109	0.0332301	-0.395928
22	ENSG00000275443	RP11-759A24.3	lincRNA	-0.931044	0.0333008	-0.165066
23	ENSG00000132475	H3F3B	protein_coding	-1.06325	0.0341149	-0.524124
24	ENSG00000145416	MARCH1	protein_coding	1.14405	0.0341149	0.727841
26	ENSG00000150459	SAP18	protein_coding	-2.07314	0.0357587	-0.14926
28	ENSG00000057608	GDI2	protein_coding	-6.21183	0.0376262	-0.212592
29	ENSG00000070785	EIF2B3	protein_coding	-3.1622	0.0376262	-0.309979
30	ENSG00000108684	ASIC2	protein_coding	-1.07841	0.0376262	-1.16349
31	ENSG00000154174	TOMM70A	protein_coding	0.8207	0.0376262	0.304617
32	ENSG00000170396	ZNF804A	protein_coding	0.757089	0.0376262	0.688133
33	ENSG00000168959	GRM5	protein_coding	0.759523	0.039151	0.278336
34	ENSG00000179104	TMTC2	protein_coding	0.694703	0.039151	0.700715
37	ENSG00000114784	EIF1B	protein_coding	-1.47513	0.0433256	-0.513253
38	ENSG00000164796	CSMD3	protein_coding	0.926135	0.0433256	0.975906
39	ENSG00000169851	PCDH7	protein_coding	1.17498	0.0433256	0.662196
40	ENSG00000171314	PGAM1	protein_coding	-2.94421	0.0433256	-0.163646
41	ENSG00000233635	AC037445.1	antisense	-1.60346	0.0433256	-0.2562
42	ENSG00000131100	ATP6V1E1	protein_coding	-2.94695	0.0439256	-0.232611

## Sheet: C_3
	gene.IDs	gene.names	gene.biotypes	FCs	FDRs	raw_FC
1	ENSG00000152208	GRID2	protein_coding	1.44444	0.000564502	0.37441
2	ENSG00000196569	LAMA2	protein_coding	-1.90603	0.0103705	-0.346679
3	ENSG00000156475	PPP2R2B	protein_coding	-0.440329	0.0120329	-0.573779
4	ENSG00000134294	SLC38A2	protein_coding	0.21467	0.0295424	0.263021

## Sheet: C_4
	gene.IDs	gene.names	gene.biotypes	FCs	FDRs	raw_FC
1	ENSG00000231079	AC105402.4	antisense	-1.28421	0.00782651	-1.12631

## Sheet: C_6
	gene.IDs	gene.names	gene.biotypes	FCs	FDRs	raw_FC
1	ENSG00000248527	MTATP6P1	unprocessed_pseudogene	0.923211	0.0310962	0.291175
2	ENSG00000132849	INADL	protein_coding	0.23692	0.0455873	0.202195

## Sheet: C_7
	gene.IDs	gene.names	gene.biotypes	FCs	FDRs	raw_FC
4	ENSG00000225972	MTND1P23	unprocessed_pseudogene	0.188497	0.0109735	0.35057

[truncated: 3 more sheets: C_8, C_9, Combined]
