# Supplementary material for: Identification of amygdala-expressed genes associated with autism spectrum disorder
Source: Mol Autism. 2020 May 27;11:39. doi: 10.1186/s13229-020-00346-1 (PMC7251751; doi:10.1186/s13229-020-00346-1)
Supplement: Supplementary file 5 — Additional file 5. Overlap between the 271 amygdala candidate ASD genes and markers of human amygdala cell types. [file 13229_2020_346_MOESM5_ESM.xlsx]

## Sheet: 80 genes overlap
C1	C2	C3	C4	C5	C6	C7	C8	C9	C10	C11	C12	C13	C14	C15		80 genes	overlap	DEGs	exp_over	expressed	p	q	minus log10(q)
CNTP4	CAC2D3	CNTP4	GABRB2		GABRB2	GABRB2	RORB	DSCAM	GABRB3	FOXP2	GABRB2	GFAP	DSCAM	FOXP1		C1	2	289	79	27616	0.200417	0.23125	0.635918
ZBTB20	MYT1L	ZBTB20	MYT1L		GRIA2	BCL11A	NRXN1	MYT1L	GRIN2B	KCNQ3	GRIN2B	RORB	NRXN1			C2	6	175	78	27105	1.1618e-05	2.9045e-05	4.53693
	NRXN1		SCN1A		GABRB3	CAC2D3	TCF7L2	GRIK2	PLX4	CUX1	GRIN1	NRXN1	SCN1A			C3	2	242	79	27221	0.155991	0.194989	0.70999
	GRIK2		SLC6A1		GRIN2B	DSCAM	ASTN2	HCN1		HIVEP3	PRKCB	TCF7L2	ASTN2			C4	6	70	79	28870	3.94666e-08	1.48e-07	6.82974
	PLX4		CNTP4		GRIN1	FOXP1	PRODH					ASTN2	CTTNBP2			C5	0	116	78	27391	1	1	0
	ZBTB20		GRIK2		PRKCB	FOXP2	SLC1A2					PARK2	GRIK2			C6	6	209	78	27605	2.86021e-05	6.12902e-05	4.21261
						GABRB3	SOX5					SLC1A2	SEMA5A			C7	16	316	79	27763	6.13308e-16	9.195e-15	14.0364
						GRIN2B	ZBTB20					SOX5	SOX5			C8	8	255	78	27784	6.07655e-07	1.82297e-06	5.73922
						KCNQ3						ZBTB20	ZBTB20			C9	4	110	79	27603	0.000285004	0.000534382	3.27215
						MYT1L										C10	3	84	79	30427	0.00137973	0.00229956	2.63836
						NRXN1										C11	4	303	78	27359	0.011079	0.0151077	1.8208
						ASTN2										C12	4	273	78	27142	0.00797915	0.0119687	1.92195
						CNTP4										C13	9	166	79	27400	1.26562e-09	9.49215e-09	8.02264
						HIVEP3										C14	9	212	79	27815	9.49797e-09	4.74899e-08	7.3234
						PRKCB										C15	1	172	79	27080	0.395952	0.424234	0.372394
						SLC1A2

## Sheet: 271 genes overlap
Overlap between the 271 amygdala candidate ASD genes and markers of human amygdala cell types
C1	C2	C3	C4	C5	C6	C7	C8	C9	C10	C11	C12	C13	C14	C15			271 genes	overlap	DEGs	exp_over	expressed	p	q	minus log10(q)
GI1	LRRC4C	POGZ	GABRB2	DPYSL2	DPYSL2	GABRB2	RORB	DSCAM	CAC1E	ANKRD11	DPYSL2	GFAP	LRRC4C	FOXP1			C1	5	289	267	27616	0.149503	0.149503	0.825352
CNTP4	CAC1E	AUTS2	MYT1L	DYNC1H1	GABRB2	KCNMA1	NRXN1	MYT1L	GABRB3	ARID1B	GABRB2	RORB	DSCAM	ATP10A			C2	15	175	266	27105	2.28754e-10	4.90187e-10	9.30964
DIP2C	CAC2D3	CNTP4	SCN1A	SCN2A	GRIA2	BCL11A	TCF7L2	SHANK2	GRIN2B	ASH1L	DYNC1H1	NRXN1	NRXN1	CAC1C			C3	9	242	267	27221	0.000682909	0.000853636	3.06873
KIRREL3	MYT1L	DIP2C	SLC6A1	ATP1A3	GABRB3	CAC1E	ASTN2	CAC1C	CAC1C	FOXP2	GRIN2B	TCF7L2	SCN1A	CGNL1			C4	12	70	267	28870	2.02083e-12	1.01042e-11	10.9955
ZBTB20	NRXN1	DMD	CNTN5		GRIN2B	CAC2D3	CACNB2	CNTN4	CNKSR2	KCNQ3	SCN2A	ASTN2	ASTN2	PCCA			C5	4	116	266	27391	0.026736	0.0286457	1.54294
	SHANK2	KIRREL3	CNTP2		SCN2A	DSCAM	CTNND2	CNTN5	CNTN4	MED13L	STXBP1	CACNB2	CTTNBP2	SLC7A5			C6	14	209	266	27605	1.77267e-08	2.65901e-08	7.57528
	AUTS2	NRXN3	CNTP4		STXBP1	FOXP1	DPP10	CNTP2	CNTN5	CUX1	ATP1A3	CTNND2	DMD	TRIO			C7	28	316	267	27763	6.56472e-19	9.84e-18	17.007
	CNTN5	WWOX	GRIK2		ATP1A3	FOXP2	HEPACAM	DPP10	CNTP2	HIVEP3	ATP2B2	DPP10	GRIK2				C8	17	255	266	27784	4.98228e-10	9.34178e-10	9.02957
	CNTP2	ZBTB20	NRXN3		ATP2B2	GABRB3	OPHN1	GRIK2	DMD	V2	GRIN1	V2	KAT2B				C9	13	110	267	27603	5.57923e-11	1.39481e-10	9.85549
	GRIK2		PLCB1		CNKSR2	GRIN2B	PARD3B	HCN1	KIRREL3	NIPBL	PRKCB	OPHN1	V2				C10	12	84	267	30427	1.05027e-11	3.93851e-11	10.4047
	PLX4		RBFOX1		GRIN1	KCNQ3	PRKD1	NRXN3	PLX4	PACS1	RAB2A	PARD3B	NLGN4X				C11	17	303	266	27359	8.48836e-09	1.41473e-08	7.84933
	RBFOX1		RIMS1		PRKCB	MYT1L	PRODH	RBFOX1	RBFOX1	PREX1	SLC12A5	PARK2	OPHN1				C12	13	273	266	27142	3.37022e-06	4.59576e-06	5.33764
	RIMS1				SLC12A5	NRXN1	SLC1A2	RIMS1		SETBP1	SLC9A6	PRKD1	PRKD1				C13	18	166	267	27400	5.36238e-14	4.02179e-13	12.3956
	SETBP1				SLC9A6	SHANK2	SOX5			STAG1		SLC1A2	SEMA5A				C14	17	212	267	27815	2.89643e-11	8.68929e-11	10.061
	ZBTB20					ASTN2	SPARCL1			TRIO		SOX5	SOX5				C15	7	172	267	27080	0.00164622	0.00189948	2.72137
						CNTP4	WWOX			USP15		SPARCL1	TRIO
						CTNND2	ZBTB20			VPS13B		WWOX	ZBTB20
						DPP10						ZBTB20
						HIVEP3
						NRXN3
						PRICKLE1
						PRICKLE2
						PRKCB
						PRKD1
						RBFOX1
						RIMS1
						SETBP1
						SLC1A2

## Sheet: cluster_enrichment
cluster	identity	minus log10(q)		cluster	minus log10(q)					cluster	identity	minus log10(q)				cluster	minus log10(q)
C7	Excitatory neurons	14.0364		C5	0					C7	Excitatory neurons	17.007				C1	0.825352
C13	Fibrous astrocytes	8.02264		C15	0.372394					C13	Fibrous astrocytes	12.3956				C5	1.54294
C14	OPCs	7.3234		C1	0.635918					C4	Interneurons	10.9955				C15	2.72137
C4	Interneurons	6.82974		C3	0.70999					C10	Excitatory neurons	10.4047				C3	3.06873
C8	Excitatory neurons	5.73922		C11	1.8208					C14	OPCs	10.061				C12	5.33764
C2	Excitatory neurons	4.53693		C12	1.92195					C9	Excitatory neurons	9.85549				C6	7.57528
C6	Excitatory neurons	4.21261		C10	2.63836					C2	Excitatory neurons	9.30964				C11	7.84933
C9	Excitatory neurons	3.27215		C9	3.27215					C8	Excitatory neurons	9.02957				C8	9.02957
C10	Excitatory neurons	2.63836		C6	4.21261					C11	Microglia	7.84933				C2	9.30964
C12	Excitatory neurons	1.92195		C2	4.53693					C6	Excitatory neurons	7.57528				C9	9.85549
C11	Microglia	1.8208		C8	5.73922					C12	Excitatory neurons	5.33764				C14	10.061
C3	Oligos	0.70999		C4	6.82974					C3	Oligos	3.06873				C10	10.4047
C1	Oligos	0.635918		C14	7.3234					C15	Enothelial cells	2.72137				C4	10.9955
C15	Enothelial cells	0.372394		C13	8.02264					C5	Excitatory neurons	1.54294				C13	12.3956
C5	Excitatory neurons	0		C7	14.0364					C1	Oligos	0.825352				C7	17.007
